# Supplementary material
Source: PubMed Central journal article supplement (PMC3218514)
Supplement: rna0803_0529SD1.pdf [file rna0803_0529SD1.pdf]

## Supplementary Figures

**Supplementary Figure 1. Distribution of nucleosome occupancy scores in 20 kb region centered at poly(A) sites for high and low downstream nucleosome occupancy classes.** Profile of nucleosome occupancy scores around the poly(A) sites with high (top 25 percentile) (red) and low (bottom 25 percentile) (green) downstream nucleosome affinity in the 600 bp region. The Y-axis shows the total number of pooled chip-seq tags in 500 bps bins and sliding window of 100 bps.

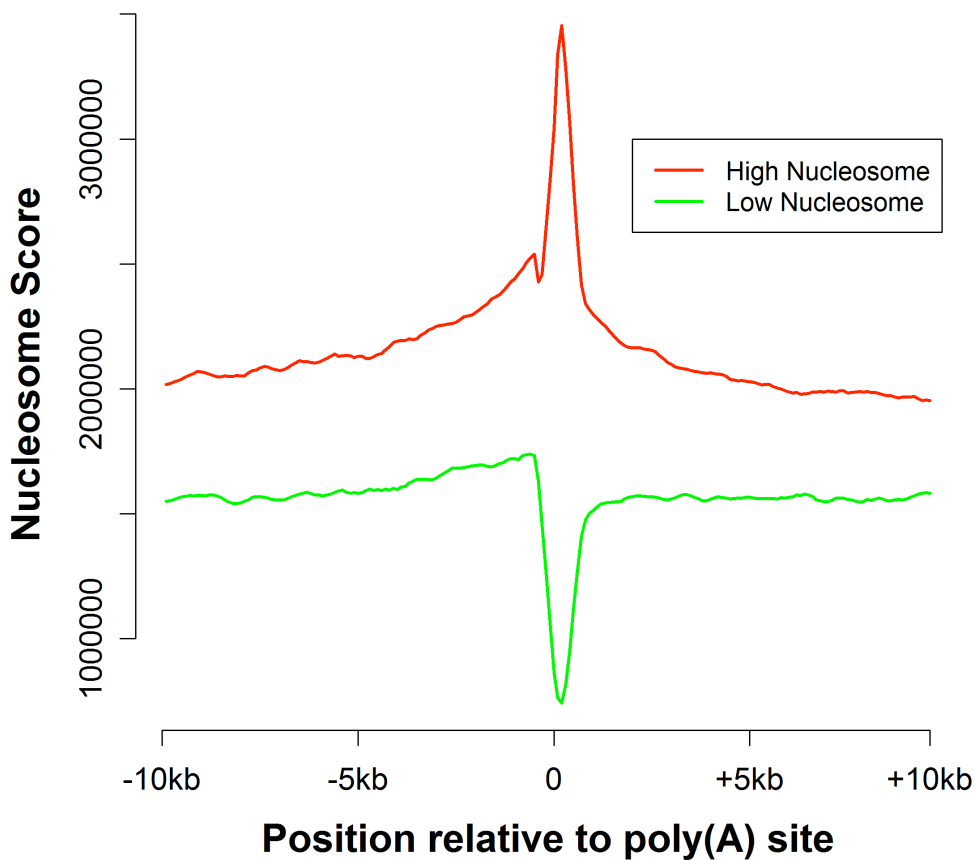

**Supplementary Figure 2. Distribution of each histone modification in 4 kb region centered at poly(A) sites.** The figures show for each HM the average profiles for all 3' UTR poly(A) sites (green, 31871 sites), only the poly(A) sites belonging to high expression genes (red, 7583 sites) and the poly(A) sites belonging to the low expression genes (blue, 7577 sites), as well as for the 87679 non-poly(A) positions that form the negative set (black).

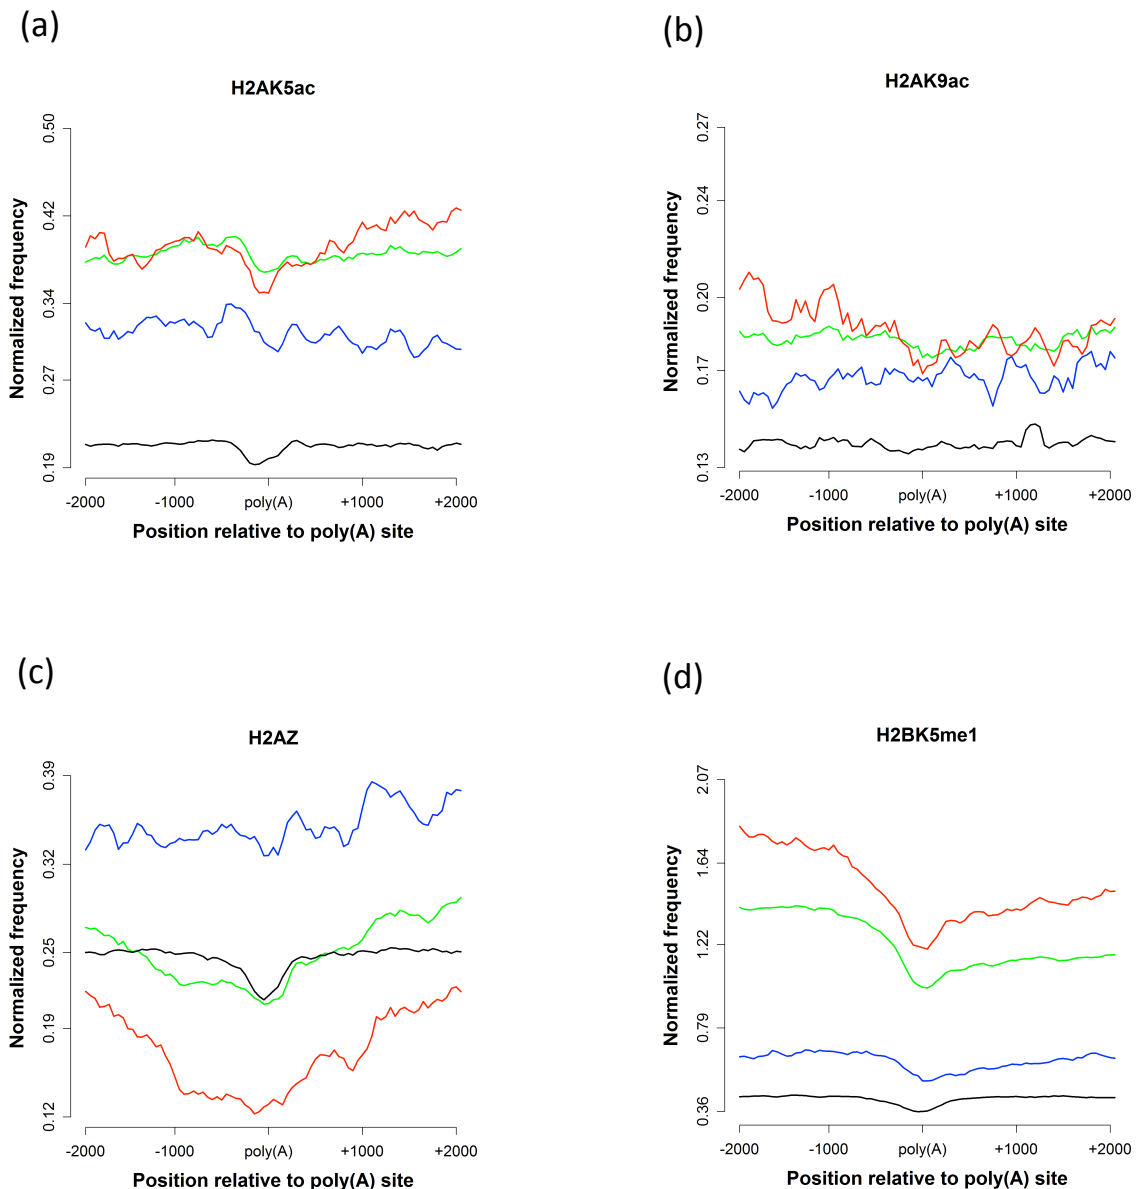

(e)

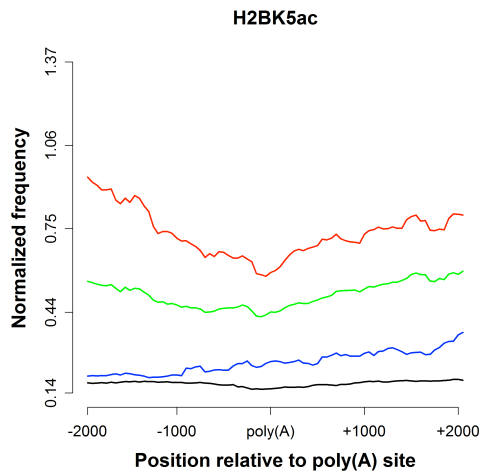

(f)

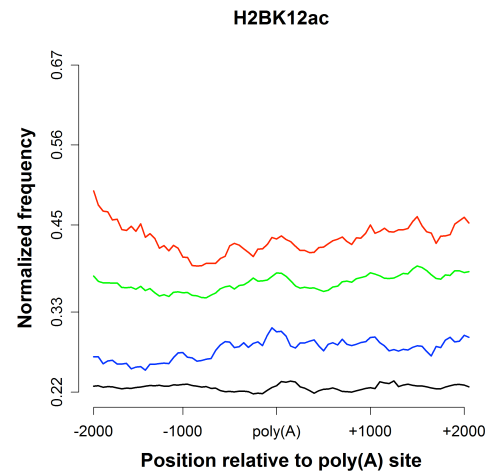

(g)

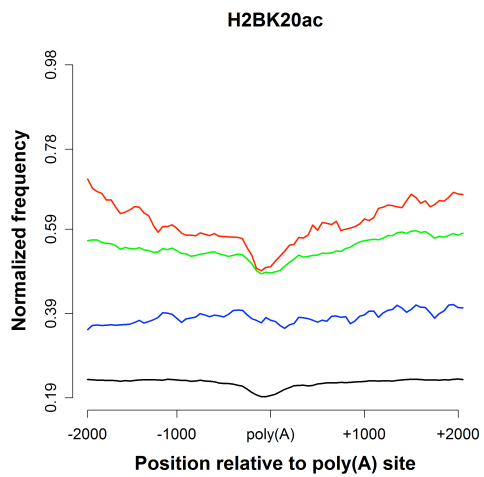

(h)

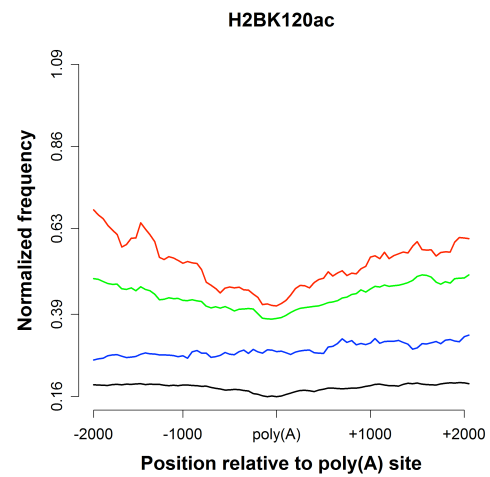

(i)

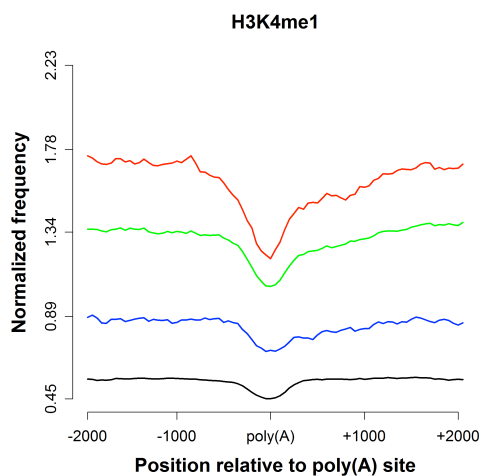

(j)

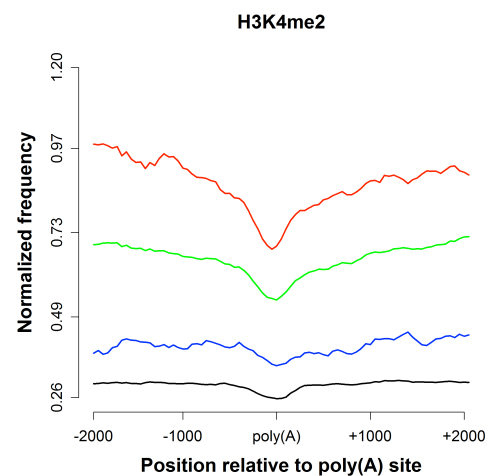

(k)

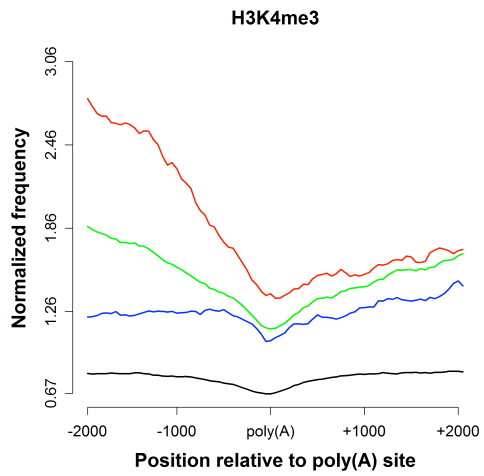

(l)

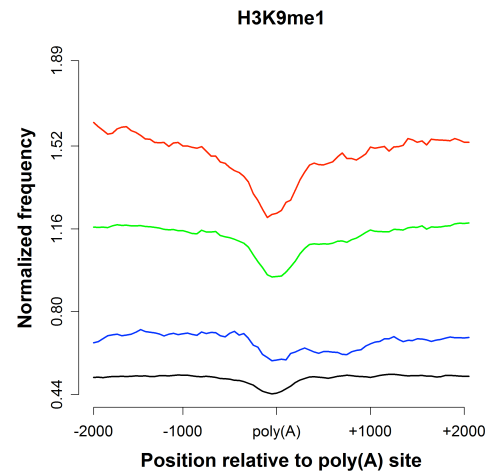

(m)

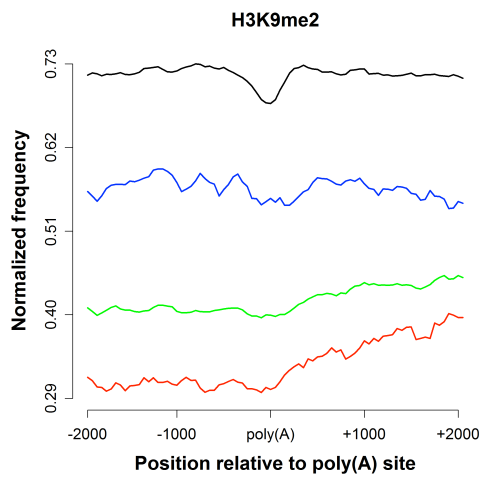

(n)

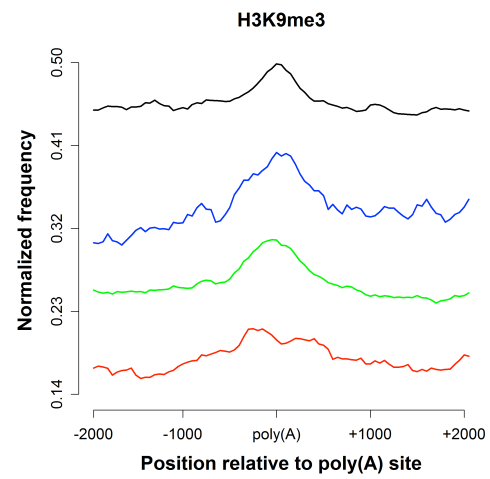

(o)

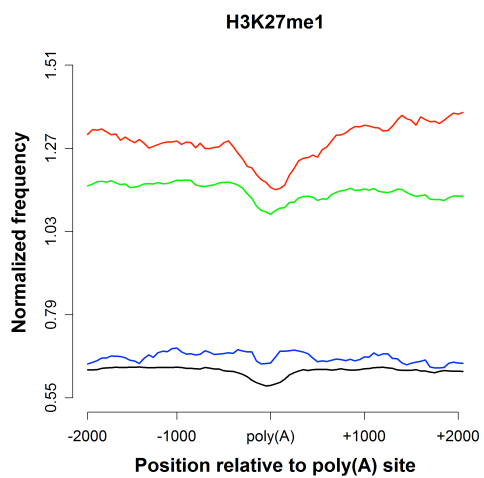

(p)

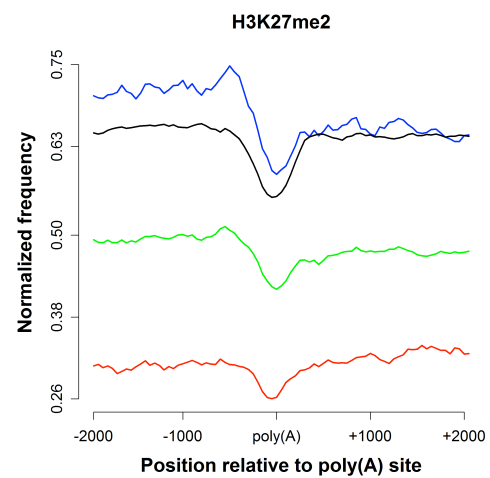

(q)

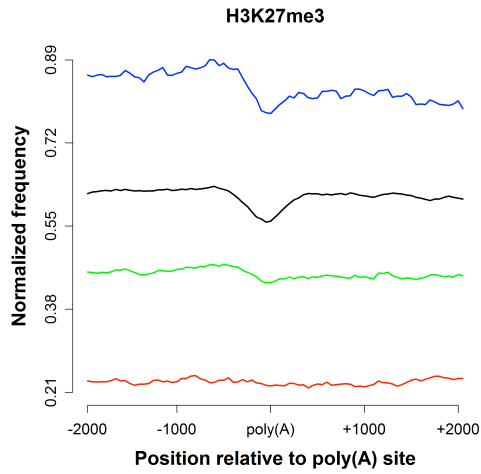

(r)

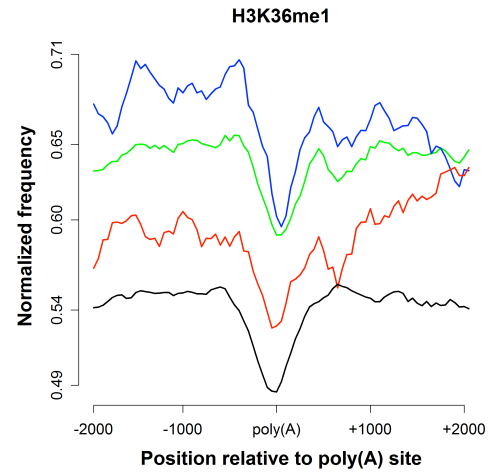

(s)

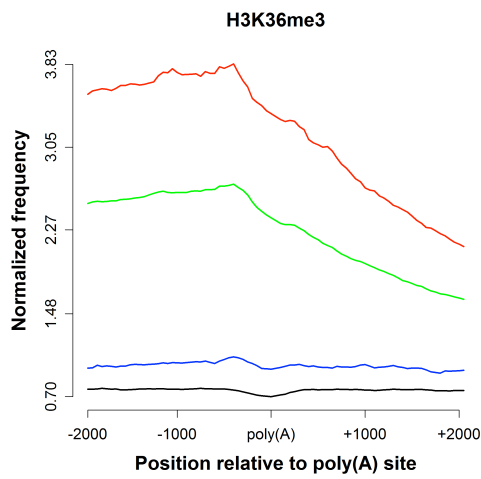

(t)

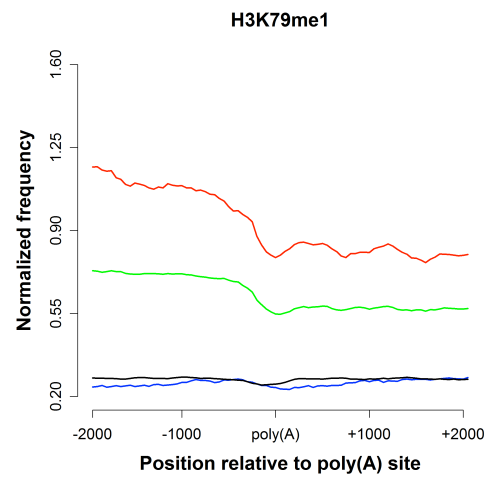

(u)

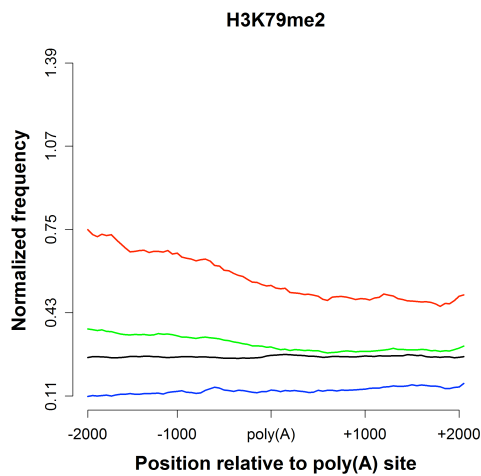

(v)

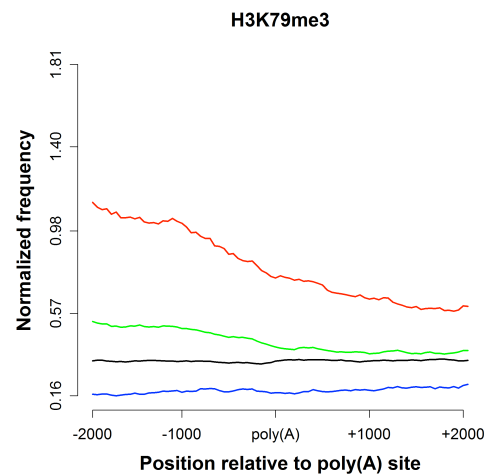

(w)

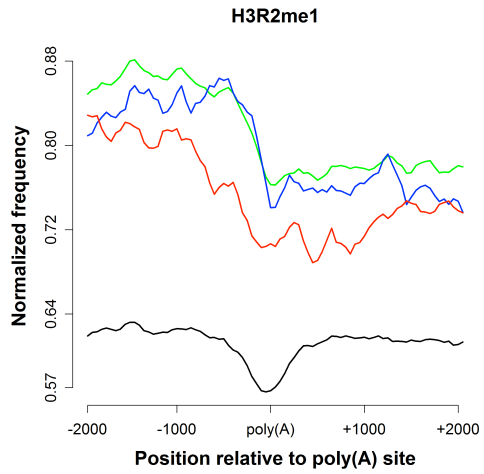

(x)

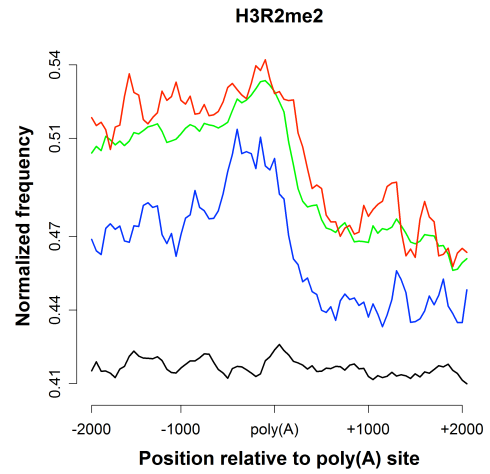

(y)

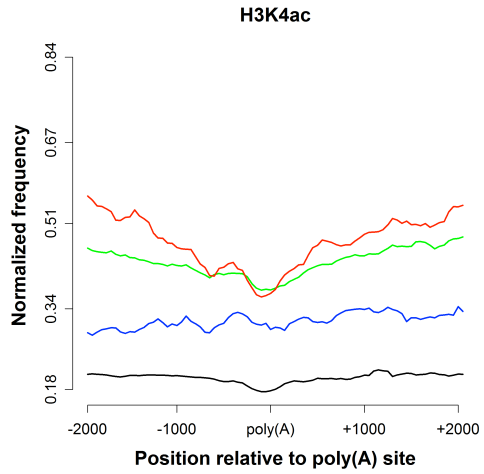

(z)

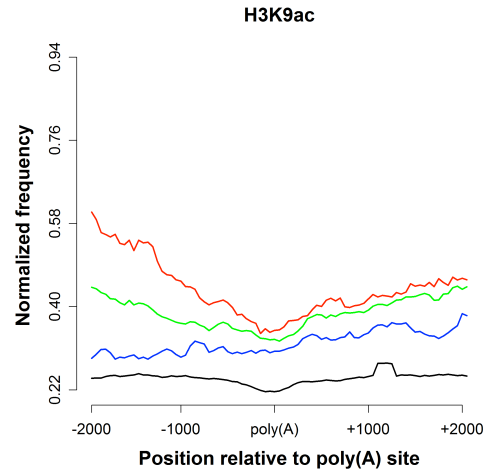

(aa)

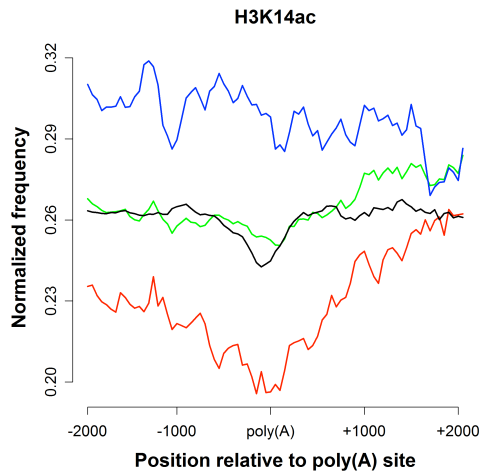

(ab)

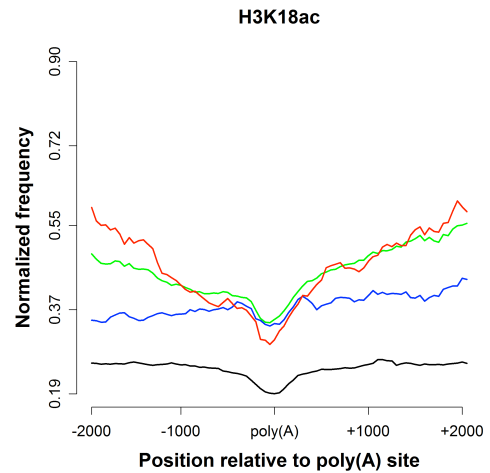

(ac)

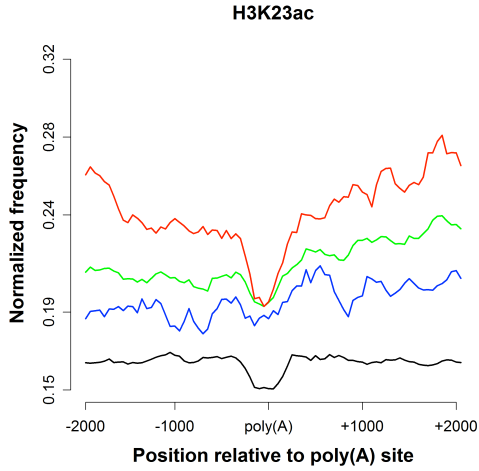

(ad)

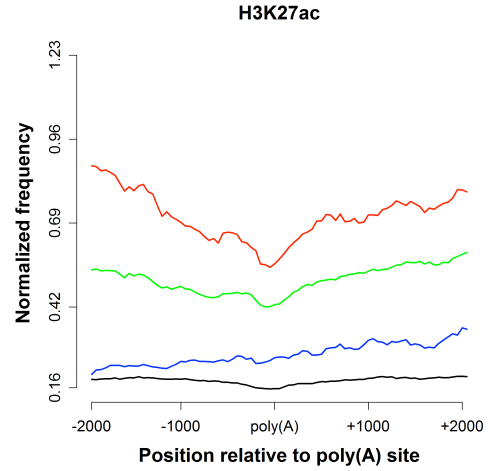

(ae)

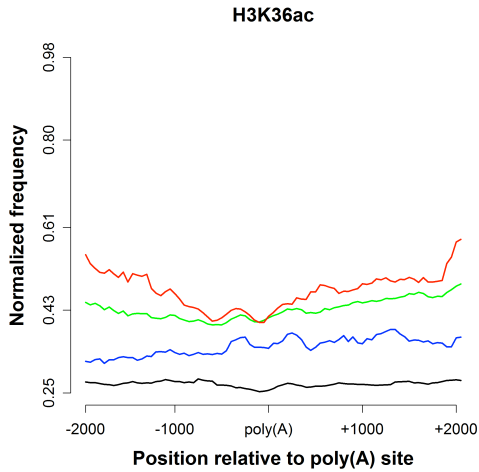

(af)

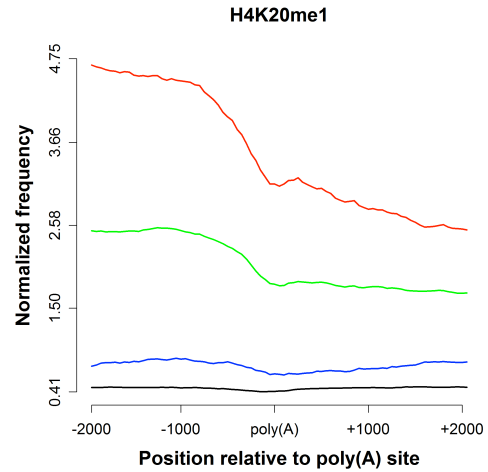

(ag)

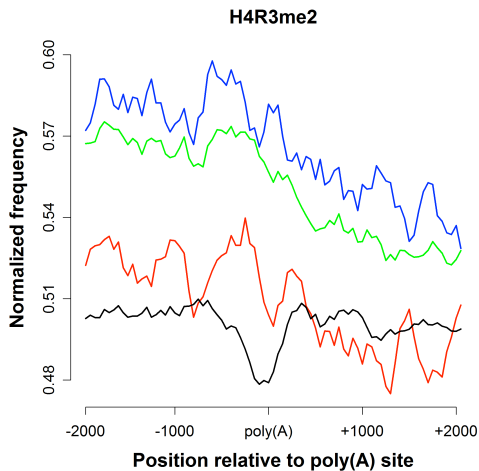

(ah)

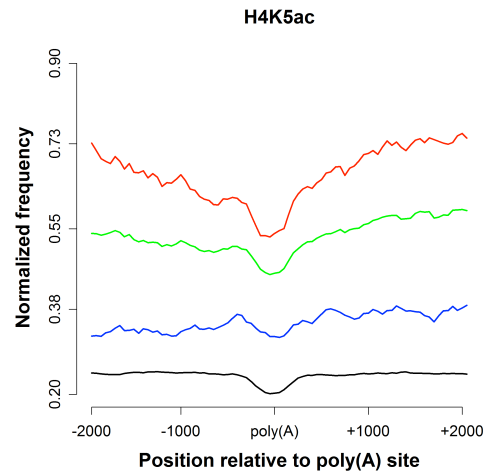

(aj)

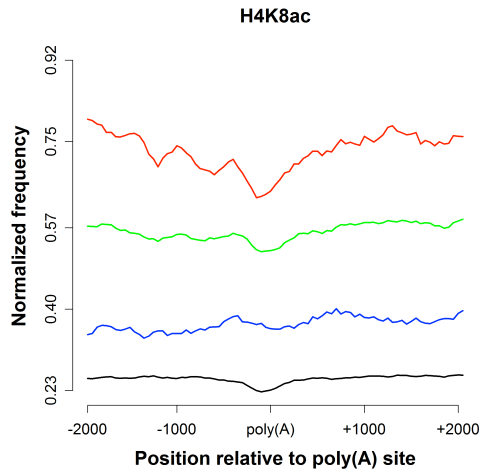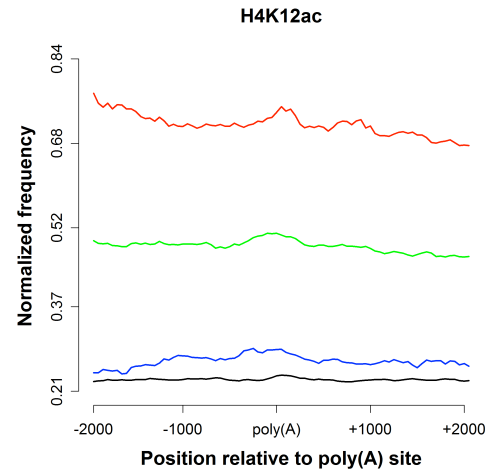

(al)

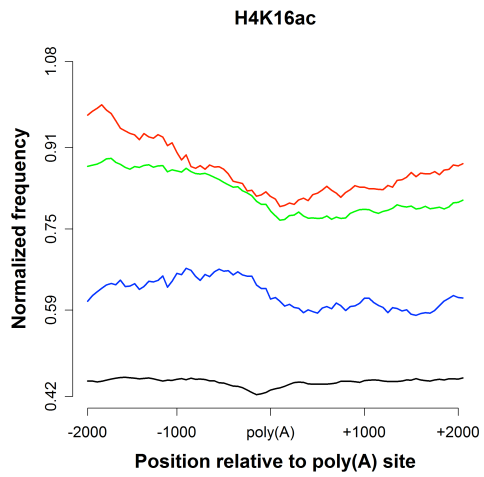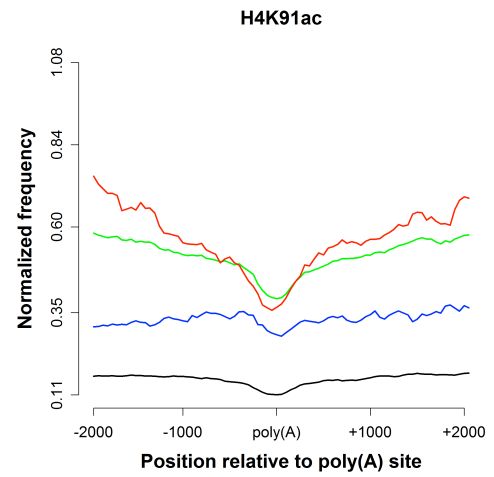



**Supplementary Figure 3. Distribution of each histone modification in 4 kb region centered at poly(A) sites for high and low usage poly(A) sites.** For each HM the figure shows the average profiles for high usage poly(A) sites (blue, 5139 sites) and low usage poly(A) sites (red, 21204 sites).

(a)

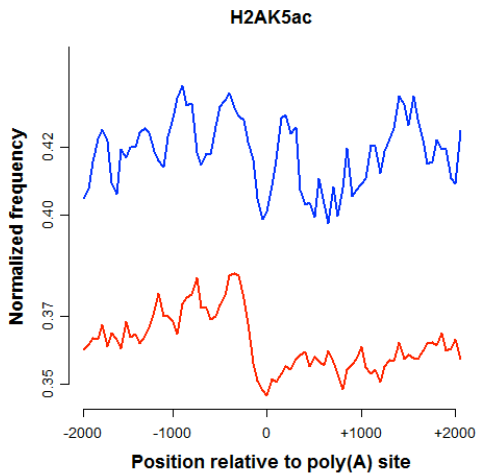

(b)

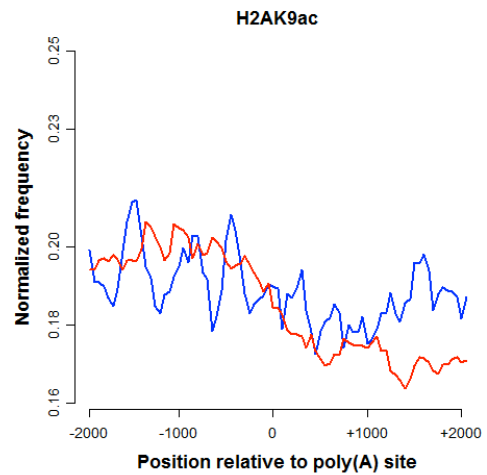

(c)

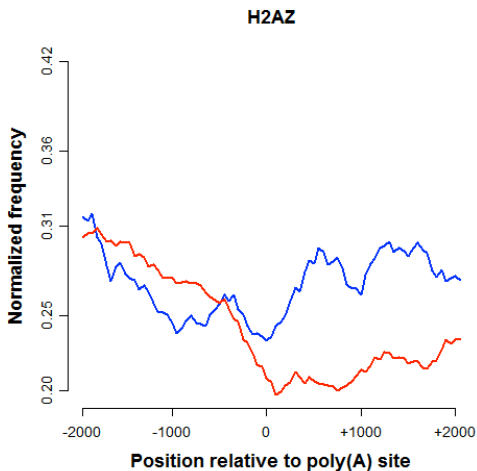

(d)

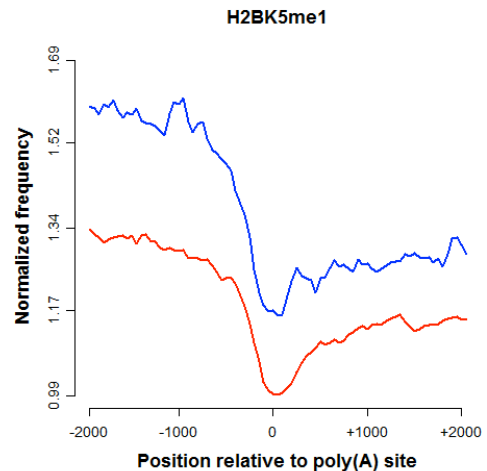

(e)

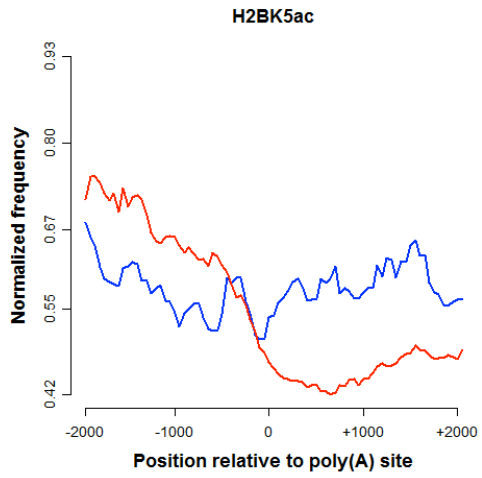

(f)

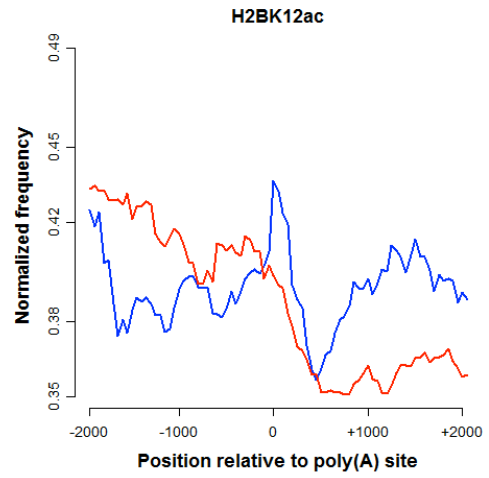

(g)

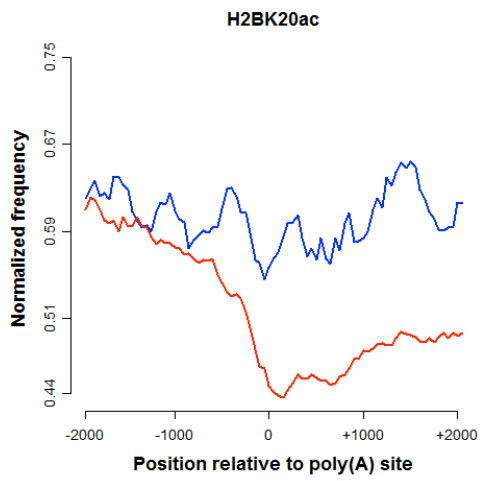

(h)

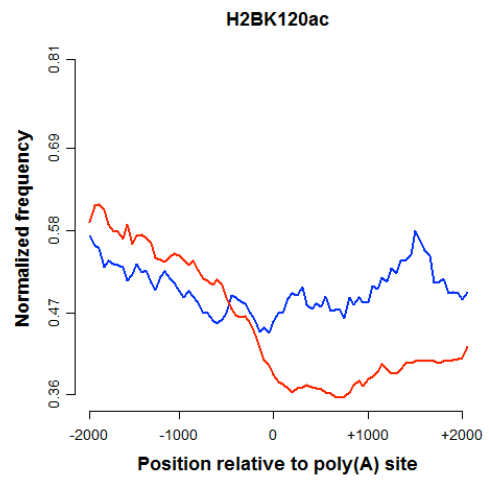

(i)

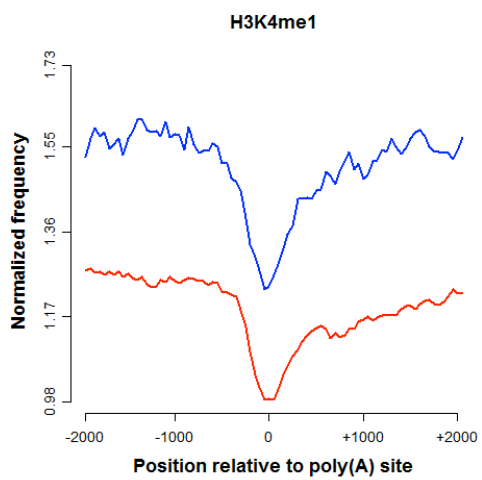

(j)

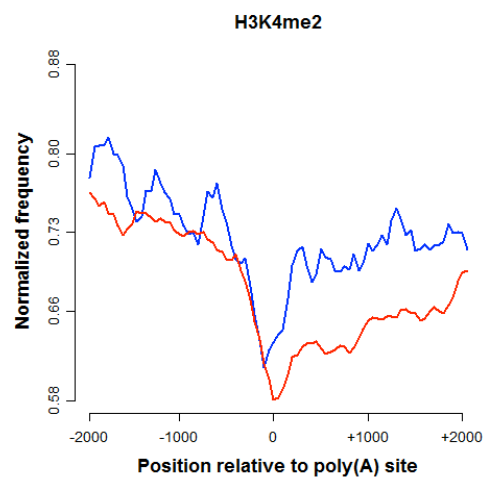

(k)

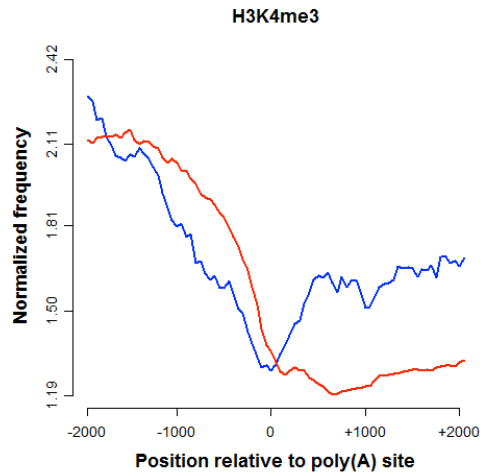

(l)

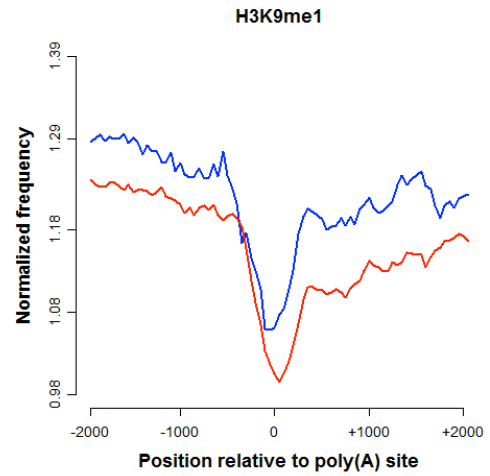

(m)

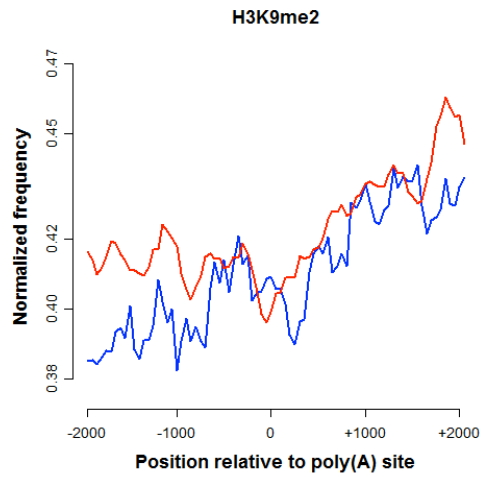

(n)

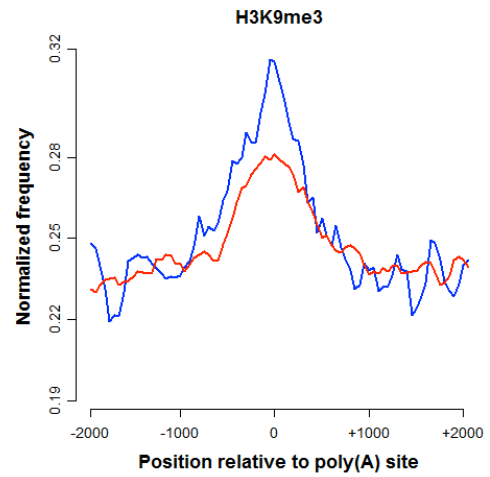

(o)

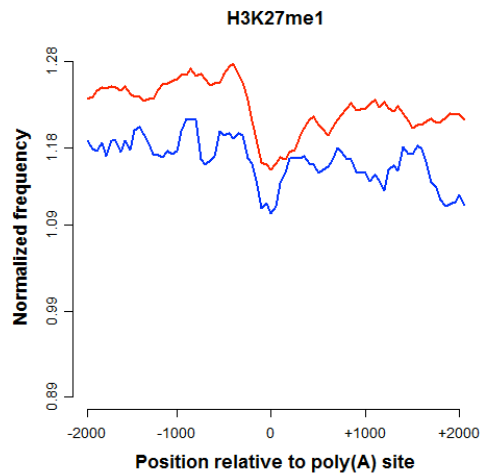

(p)

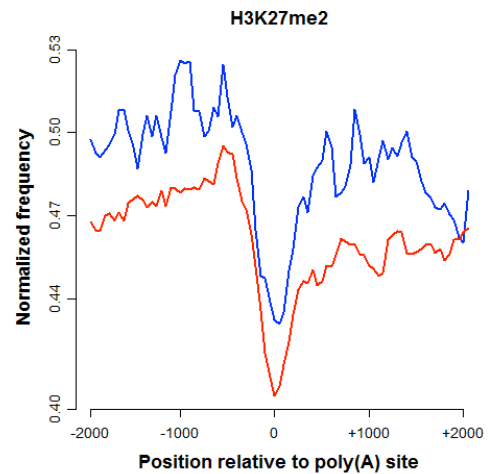

(q)

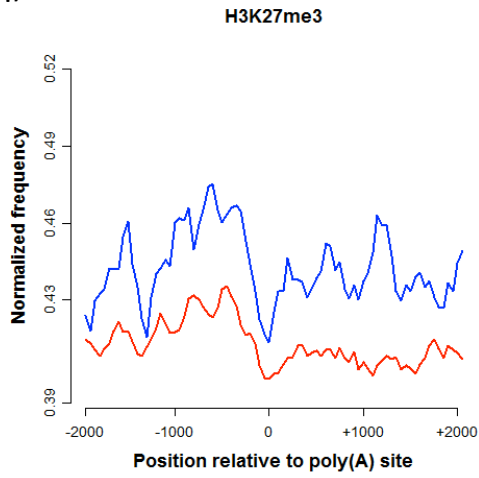

(r)

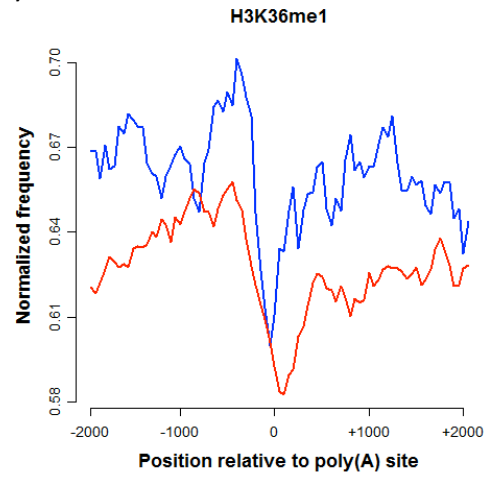

(s)

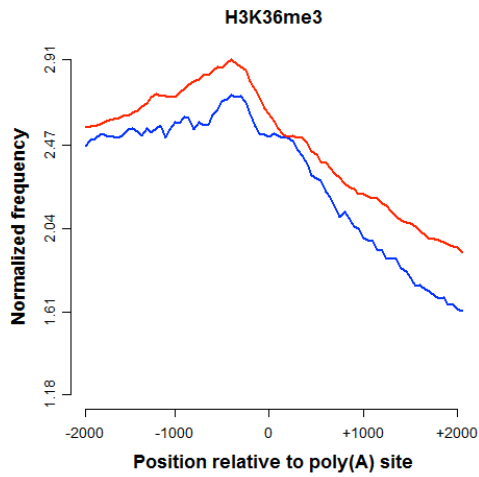

(t)

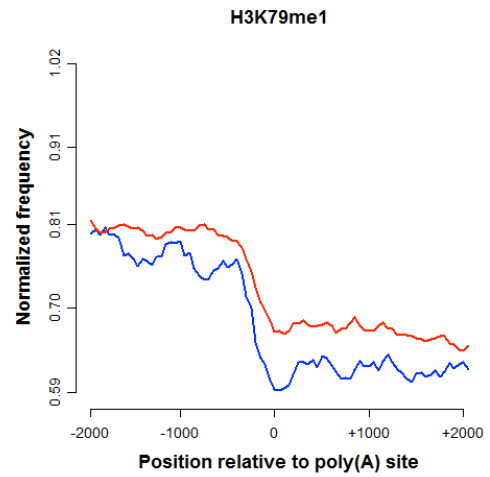

(u)

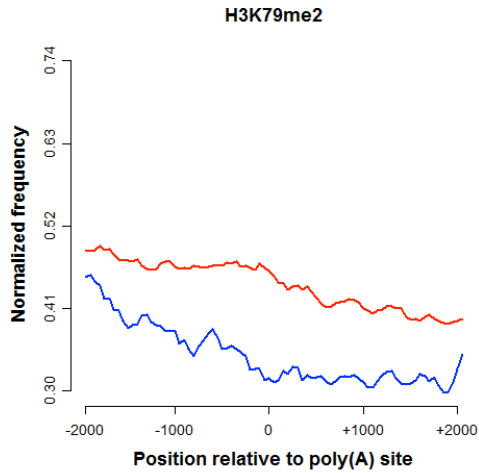

(v)

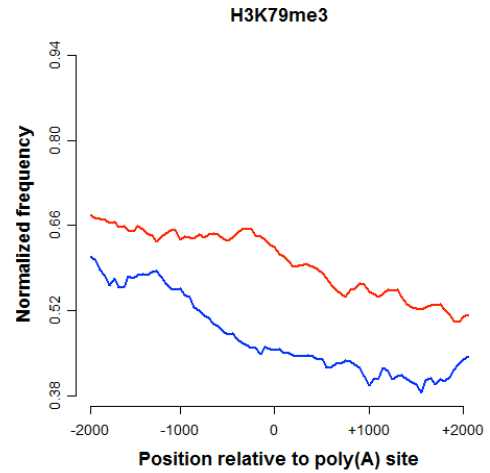

(w)

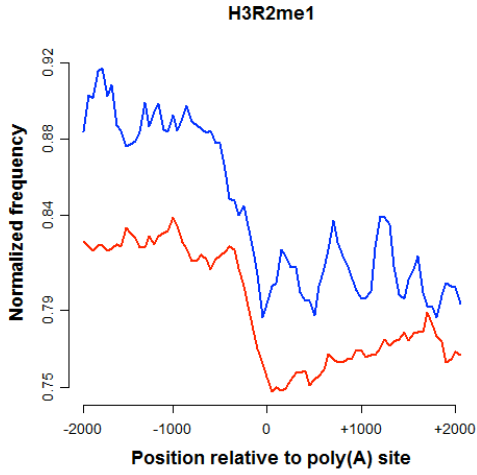

(x)

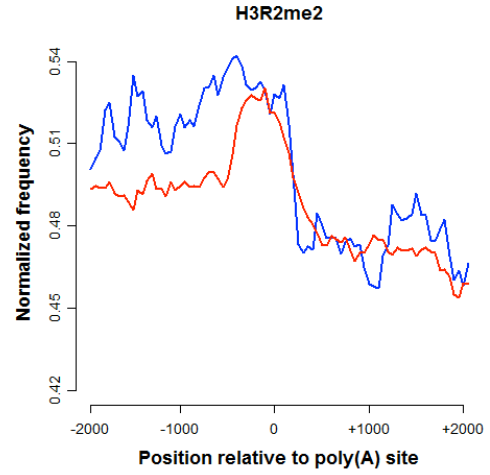

(y)

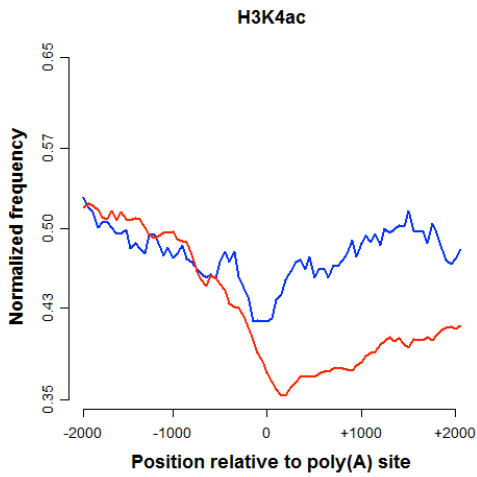

(z)

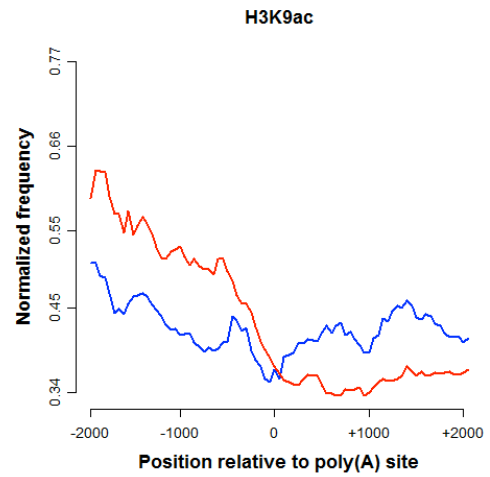

(aa)

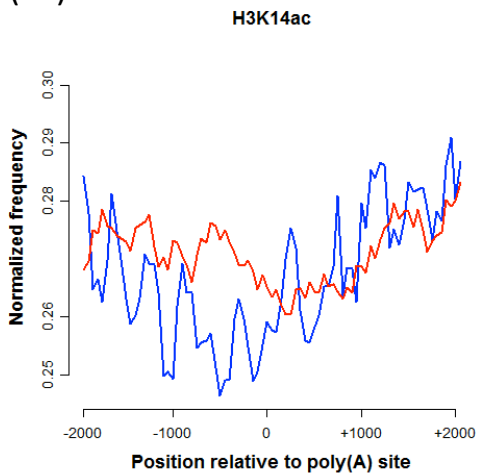

(ab)

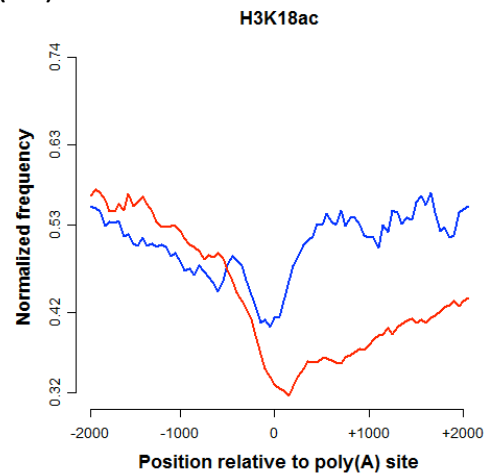

(ac)

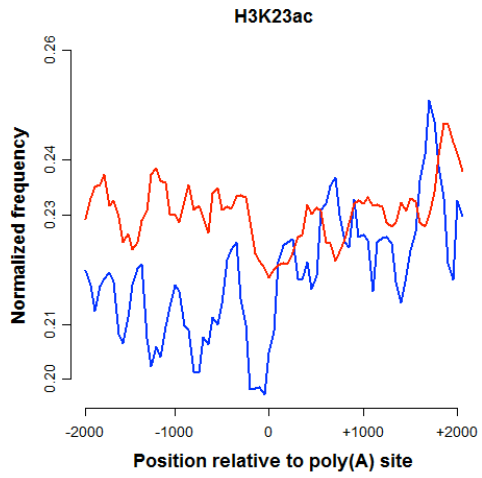

(ad)

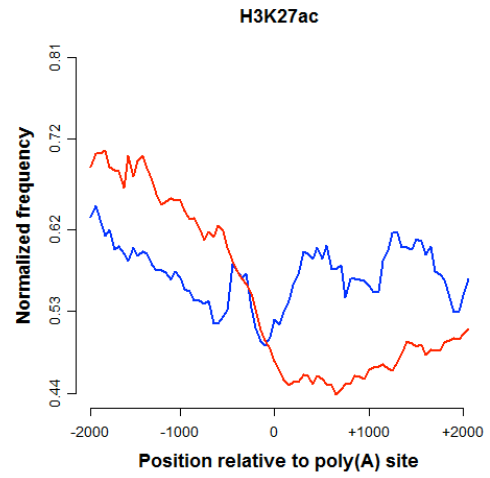

(ae)

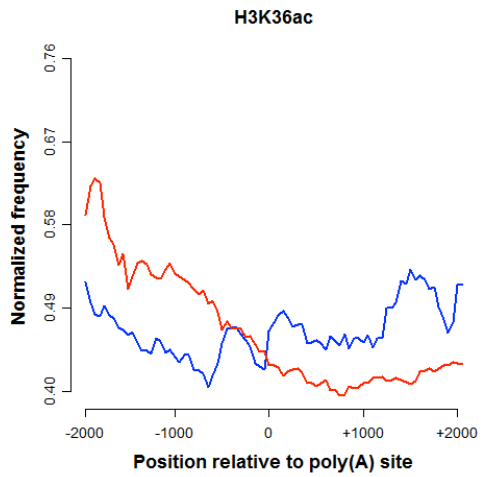

(af)

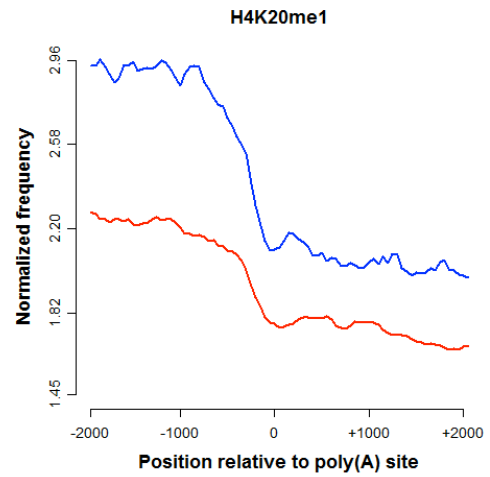

(ag)

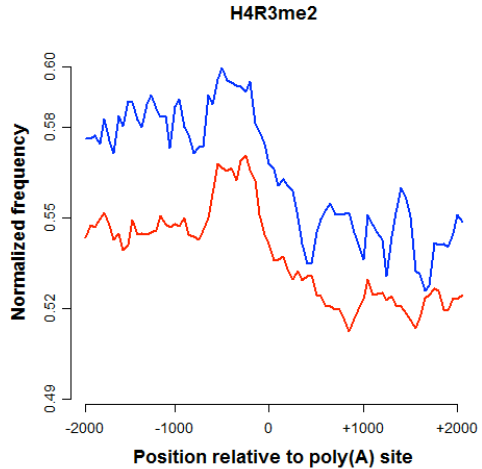

(ah)

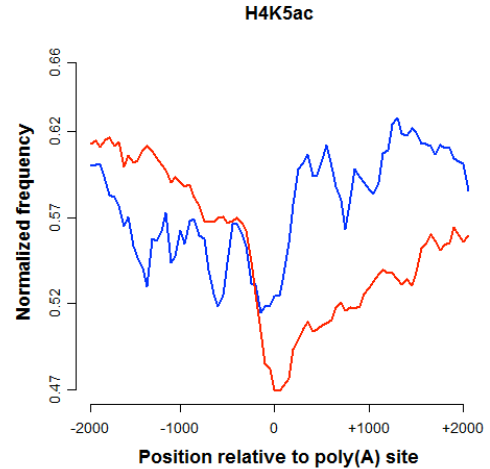

(aj)

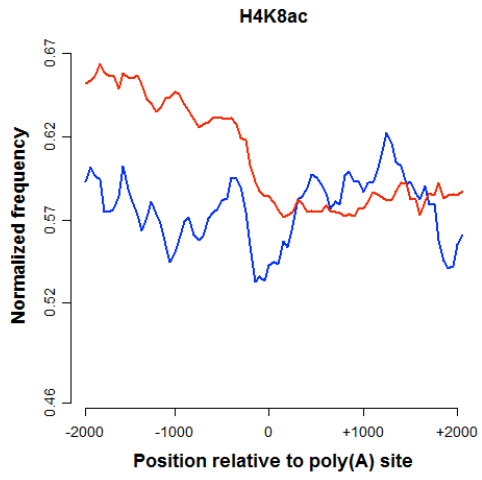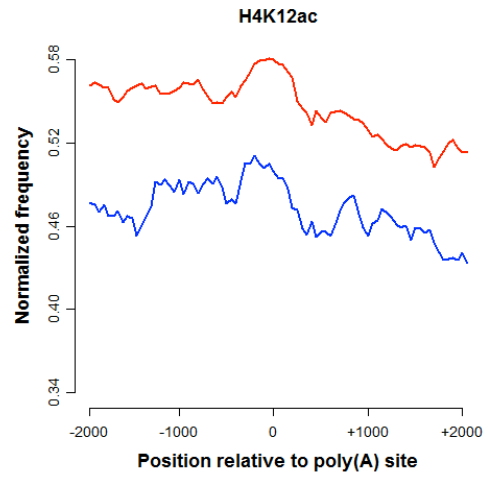

(a)

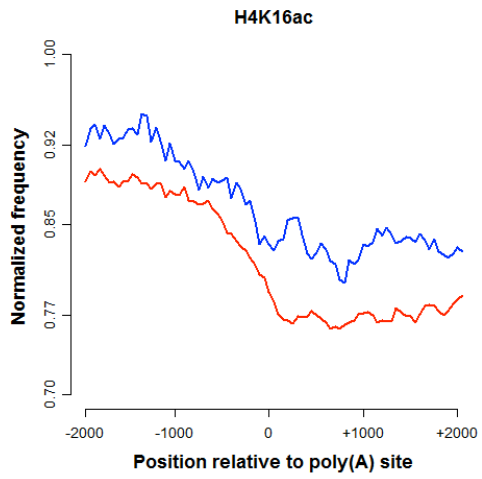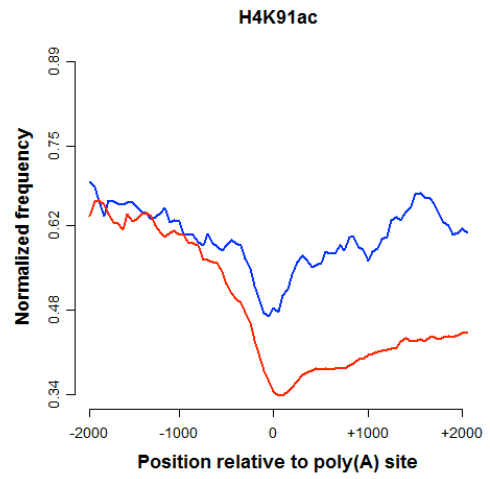

**Supplementary Figure 4. Distribution of each histone modification in 4 kb region centered at poly(A) sites for high and low usage poly(A) sites found using EST/cDNAs as well as CD4+ T cell RNA-seq data.** For each HM the figure shows the average profiles for high usage poly(A) sites (blue, 1113 sites) and low usage poly(A) sites (red, 7796 sites).

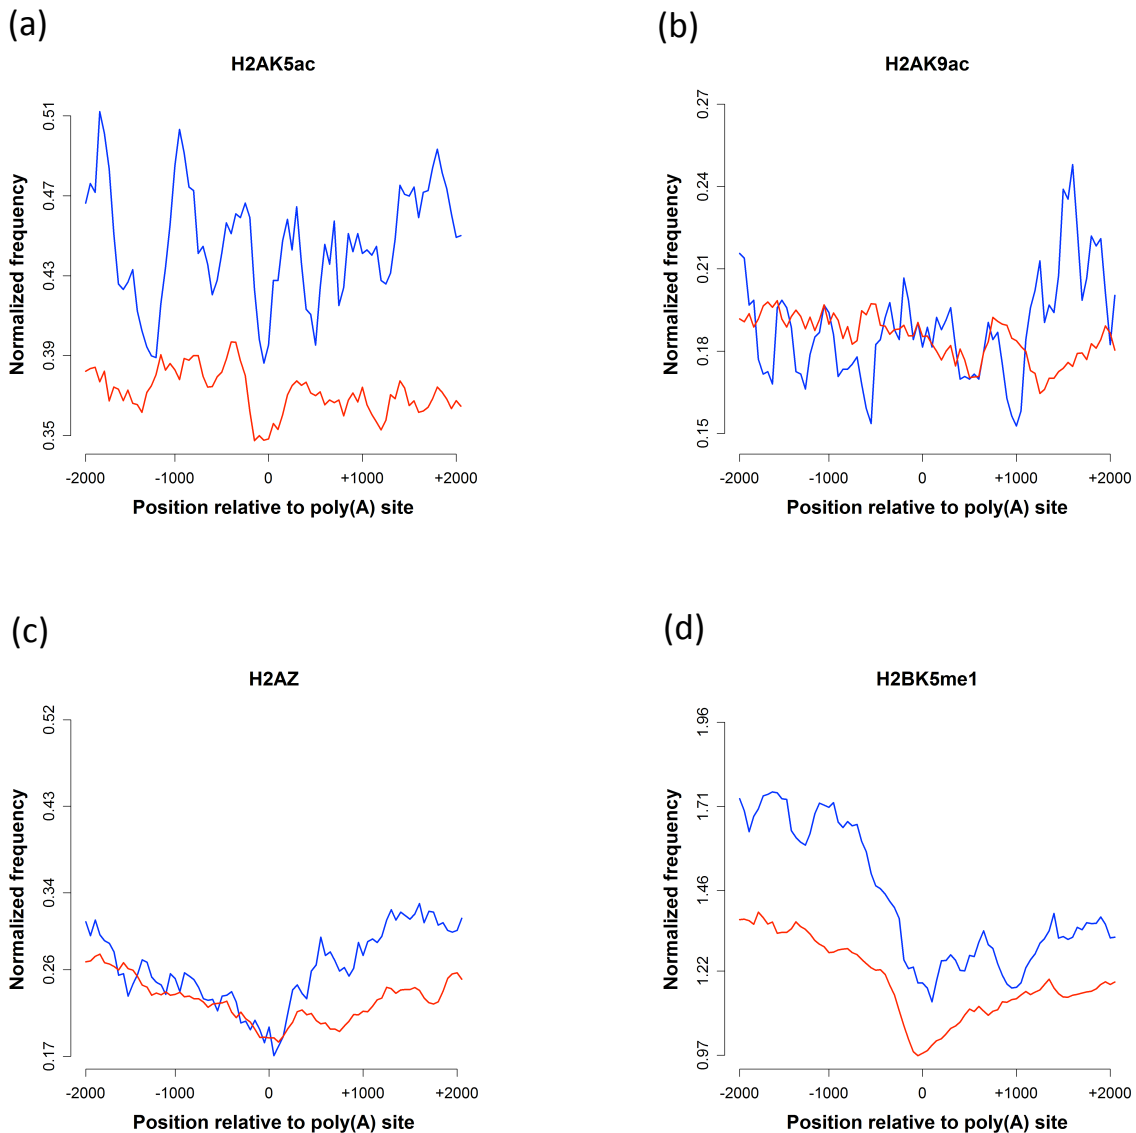



(e)

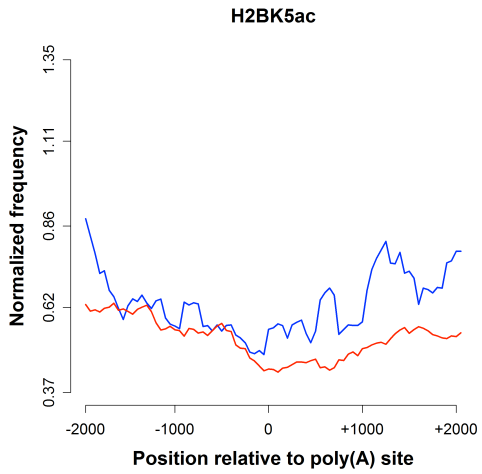

(f)

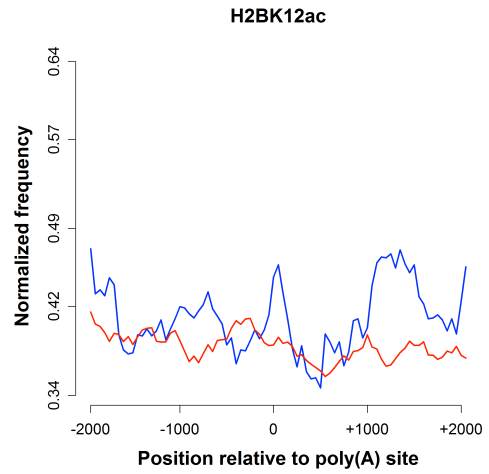

(g)

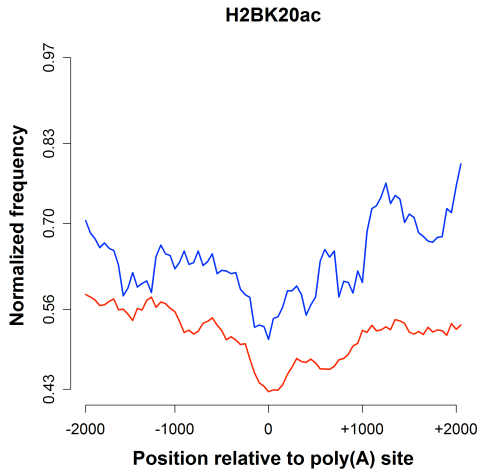

(h)

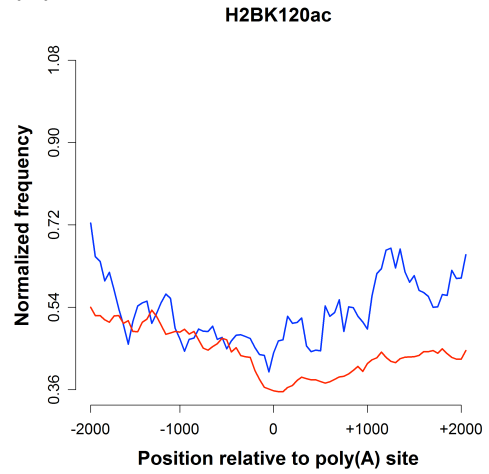

(i)

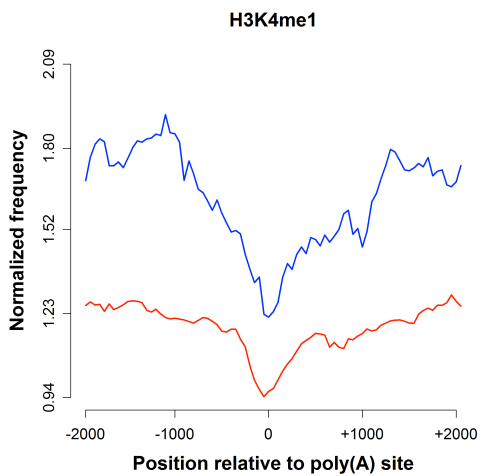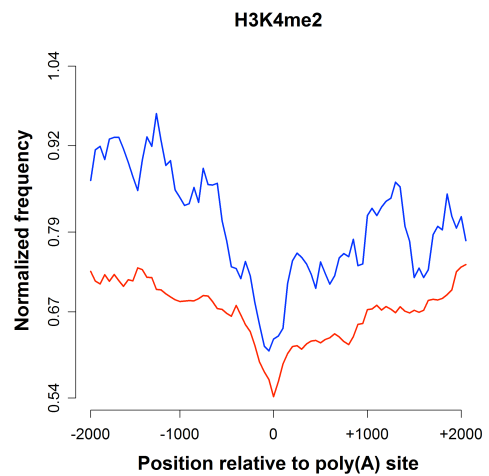

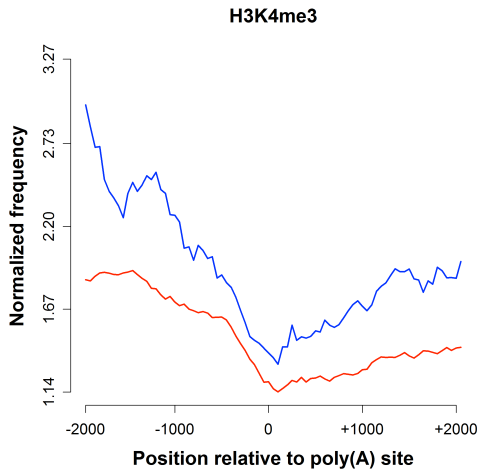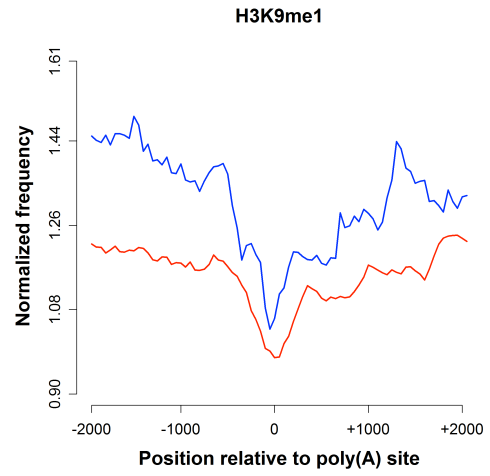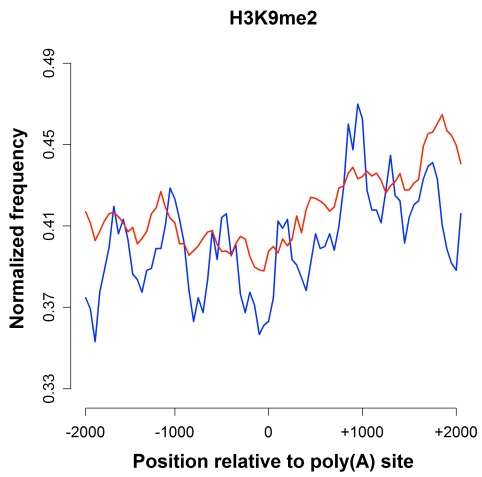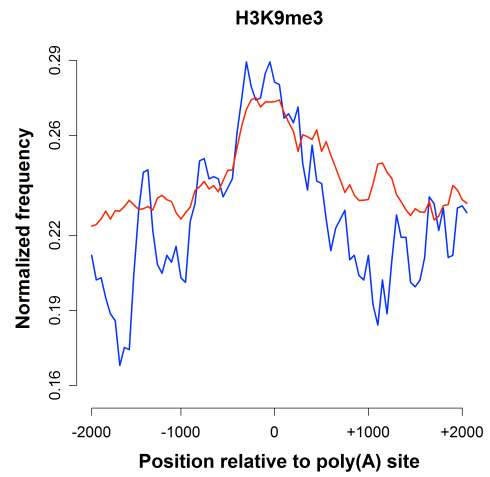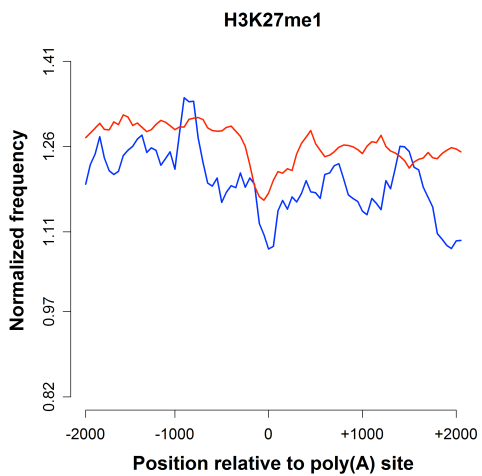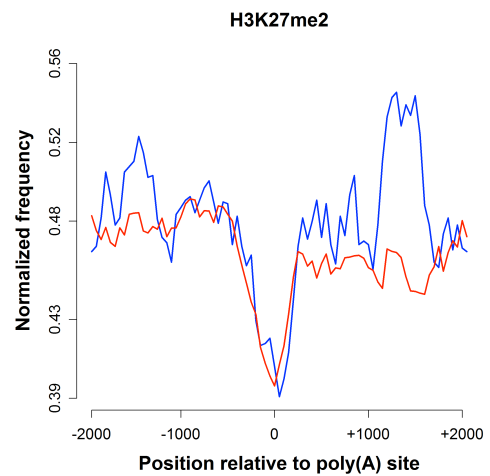

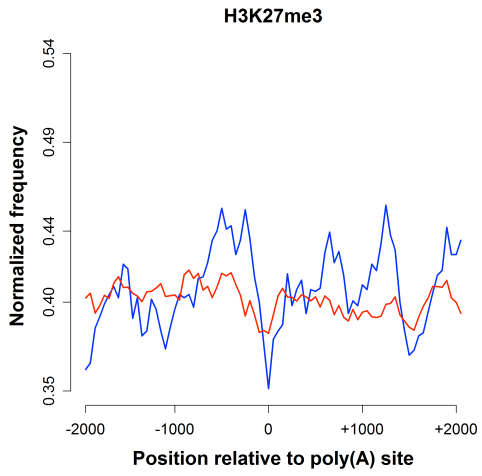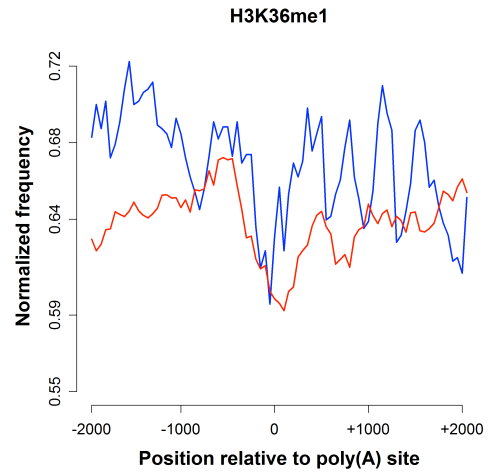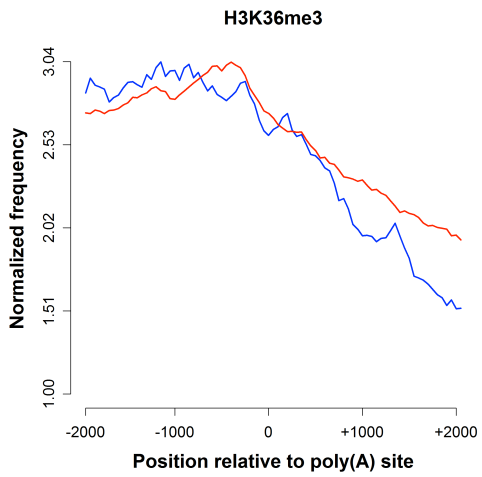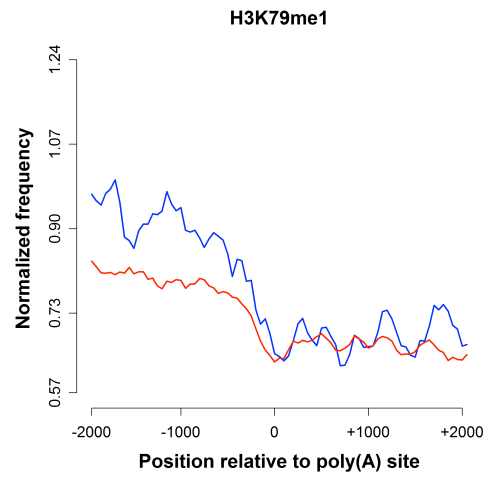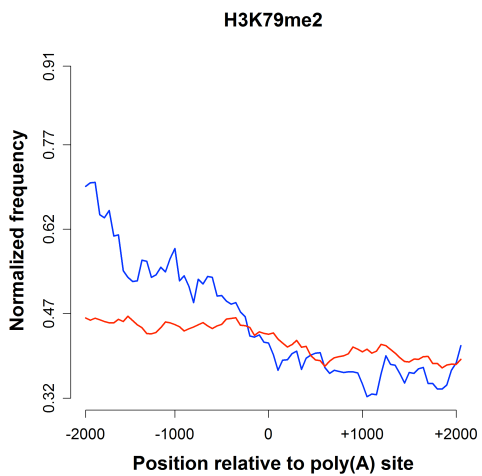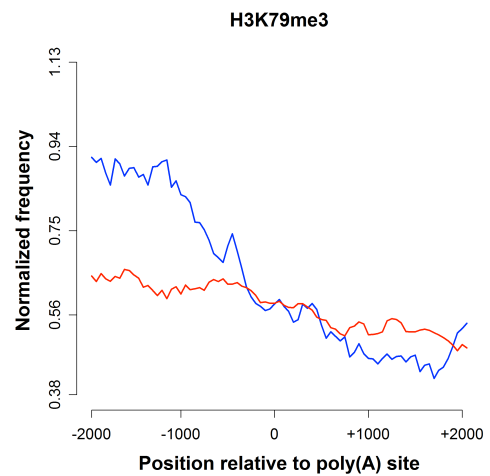

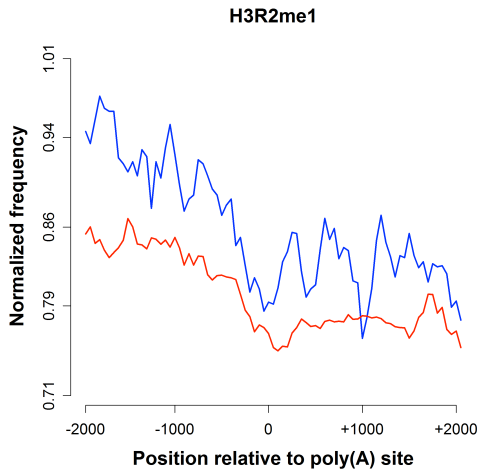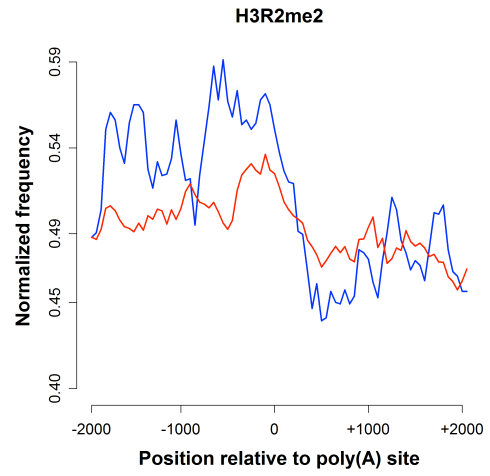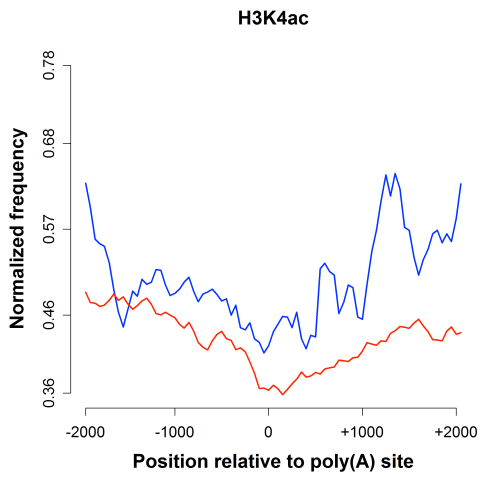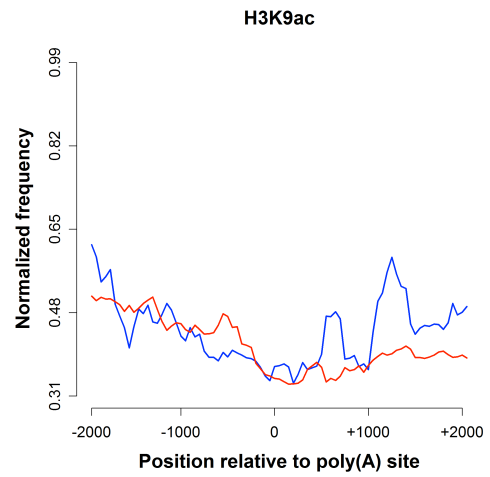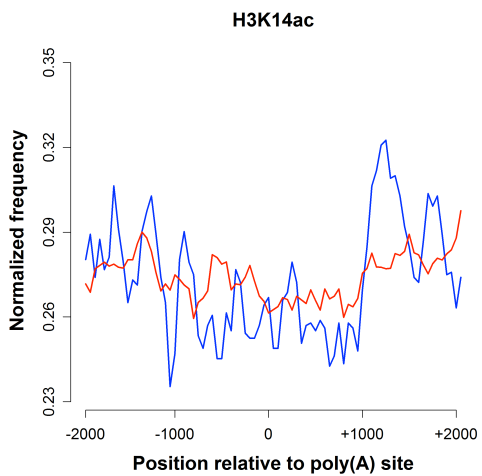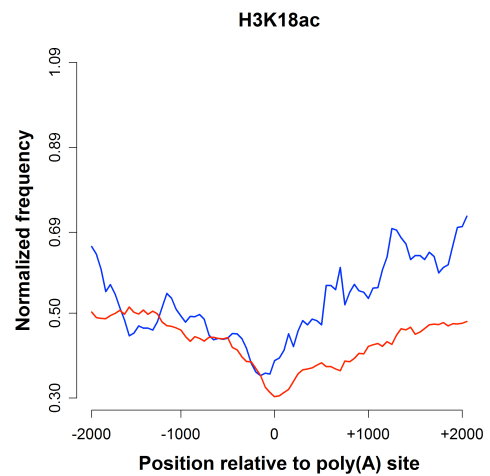

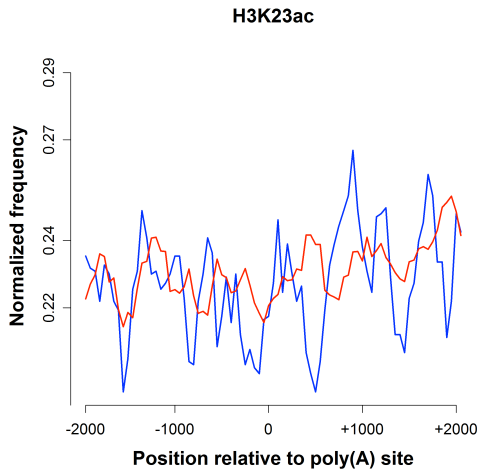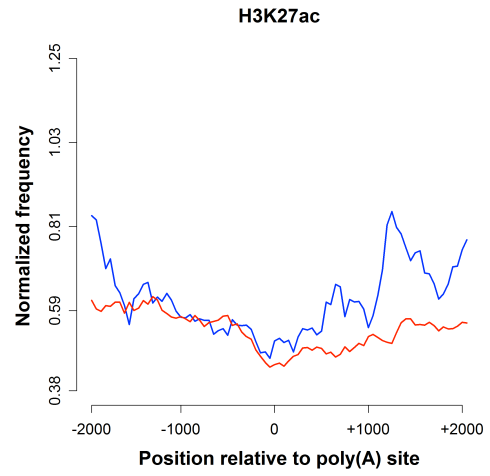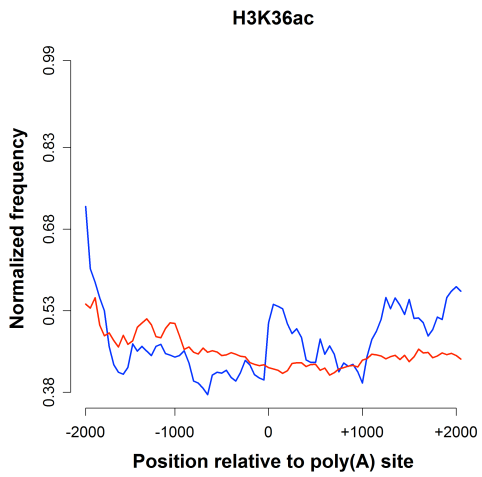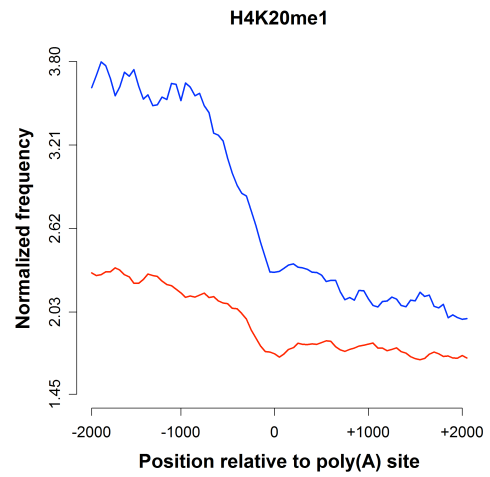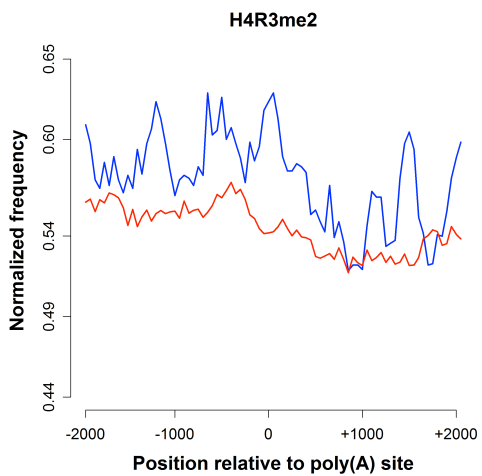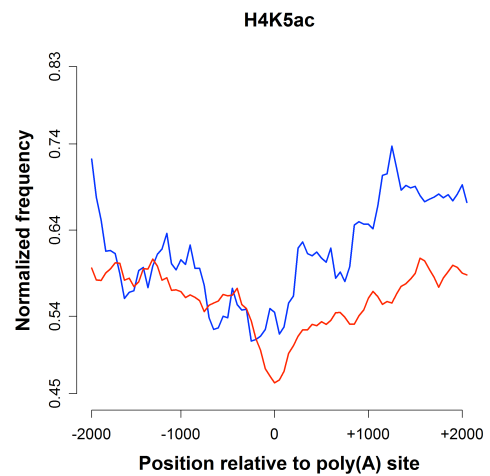

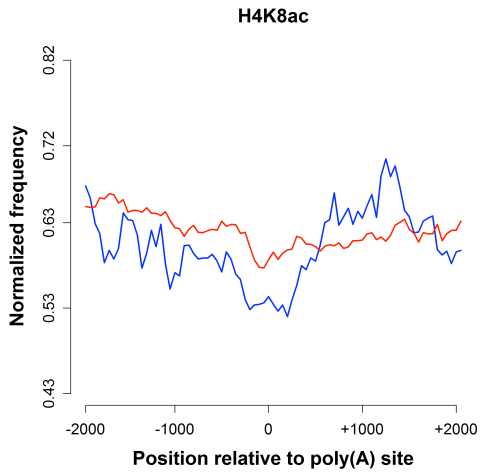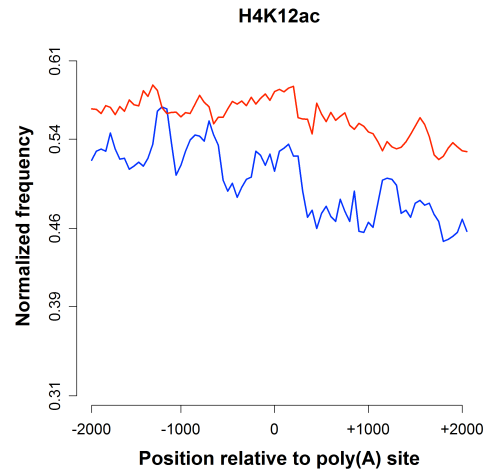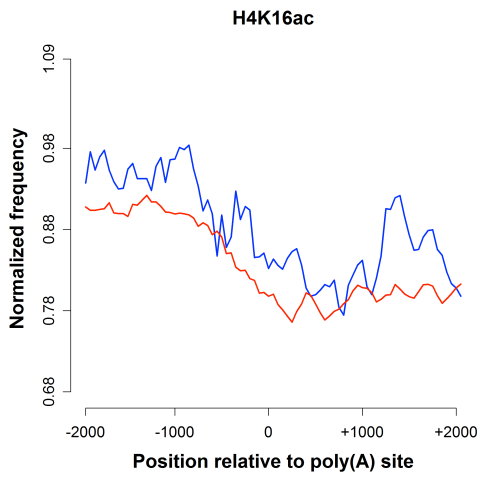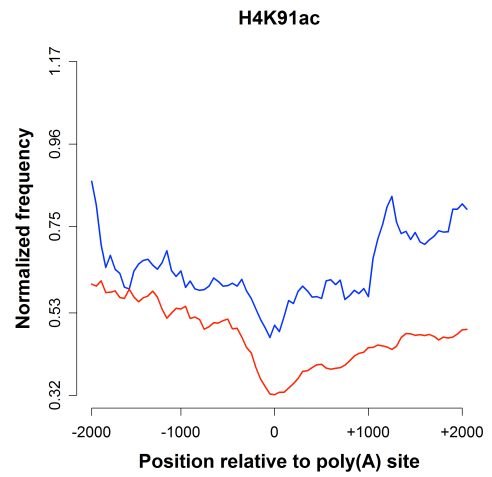

## Supplementary Tables

**Supplementary Table 1. Support Vector Machine Based Classification of Authentic Poly(A) Sites Using Post-translational Histone Modification Data**

| Histone Modification | Classification Accuracy* | Sensitivity* | Specificity* |
|----------------------|--------------------------|--------------|--------------|
| H3K36me3             | 71.5% - 71.7%            | 63.8%-63.9%  | 79.3%-79.4%  |
| H4K20me1             | 65.6% - 65.8%            | 52.5%-52.6%  | 78.5%-78.6%  |
| H2BK5me1             | 63.4% - 63.6%            | 50%-50.1%    | 76.7%-76.8%  |
| H3K79me1             | 63.2% - 63.4%            | 50.8%-50.9%  | 75.6%-75.7%  |
| H4K8ac               | 63.2% - 63.4%            | 52.5%-52.6%  | 74.1%-74.2%  |
| H3K9me1              | 63.1% - 63.3%            | 53.1%-53.2%  | 73.1%-73.2%  |
| H3K27me1             | 62.7% - 62.9%            | 50.6%-50.7%  | 74.8%-74.9%  |
| H4K12ac              | 62.6% - 62.8%            | 49%-49.1%    | 76.2%-76.3%  |
| H3K27ac              | 61.5% - 61.7%            | 54.5%-54.6%  | 68.5%-68.6%  |
| H2BK5ac              | 61.2% - 61.4%            | 53.1%-53.2%  | 69.2%-69.3%  |
| H4K5ac               | 61.2% - 61.4%            | 54.1%-54.2%  | 68.4%-68.5%  |
| H4K91ac              | 60.7% - 60.9%            | 49.4%-49.5%  | 71.9%-72%    |
| H2BK20ac             | 60.6% - 60.8%            | 57.4%-57.5%  | 63.8%-63.9%  |
| H3K4me2              | 60.5% - 60.7%            | 48.4%-48.5%  | 72.6%-72.7%  |
| H4K16ac              | 60.2% - 60.4%            | 48.8%-48.9%  | 71.5%-71.6%  |
| H3K4me1              | 59.2% - 59.4%            | 47.5%-47.6%  | 69.9%-71%    |
| H3K9me2              | 59% - 59.2%              | 76.3%-76.4%  | 41.7%-41.8%  |
| H2BK120ac            | 58.8% - 59%              | 52.3%-52.4%  | 65.3%-65.4%  |
| H3K4ac               | 58.5% - 58.7%            | 53%-53.1%    | 64%-64.1%    |
| H3K9me3              | 58.1% - 58.3%            | 78.1%-78.2%  | 38.1%-38.2%  |
| H2AK5ac              | 57.3% - 57.5%            | 48.2%-48.3%  | 66.4%-66.5%  |
| H3K27me3             | 57% - 57.2%              | 73.5%-73.6%  | 40.4%-40.5%  |
| H3K79me2             | 56.9% - 57.1%            | 46%-46.1%    | 67.7%-67.8%  |
| H3K27me2             | 56.7% - 56.9%            | 72.4%-72.5%  | 40.9%-41%    |
| H2BK12ac             | 56.6% - 56.8%            | 47.4%-47.5%  | 65.9%-66%    |
| H3K36ac              | 56.5% - 56.7%            | 47.1%-47.2%  | 65.8%-65.9%  |
| H3K18ac              | 56.3% - 56.5%            | 50.6%-50.7%  | 61.9%-62%    |
| H2AZ                 | 56% - 56.2%              | 63.7%-63.8%  | 48.2%-48.3%  |
| H3K79me3             | 55.9% - 56.1%            | 44.6%-44.7%  | 67.1%-67.2%  |
| H3R2me1              | 55.2% - 55.4%            | 48.4%-48.5%  | 61.9%-62%    |
| H3K4me3              | 54.7% - 54.9%            | 49.4%-49.5%  | 60%-60.1%    |
| H3R2me2              | 54.3% - 54.5%            | 45.1%-45.2%  | 63.5%-63.6%  |
| H3K23ac              | 54.1% - 54.3%            | 46.7%-46.8%  | 61.3%-61.4%  |
| H3K9ac               | 53.9% - 54.1%            | 41.9%-42%    | 65.8%-65.9%  |
| H3K36me1             | 53.7% - 53.9%            | 48.1%-48.2%  | 59.3%-59.4%  |
| H2AK9ac              | 52.7% - 52.9%            | 39.1%-39.2%  | 66.2%-66.3%  |
| H4R3me2              | 52.6% - 52.8%            | 47.3%-47.4%  | 57.8%-57.9%  |
| H3K14ac              | 50.9% - 51.1%            | 57.7%-57.8%  | 44.1%-44.2%  |

\* Controlled for GC content , 95% confidence interval

**Supplementary Table 2. Support Vector Machine Based Classification of High Usage and Low Usage Poly(A) Sites (obtained from cDNA/EST Based Approach) Using Post-translational Histone Modification Data**

| <b>Histone Modification</b> | <b>Classification Accuracy*</b> | <b>Sensitivity*</b> | <b>Specificity*</b> |
|-----------------------------|---------------------------------|---------------------|---------------------|
| H3K36me3                    | 66.2% - 66.4%                   | 72.3%-72.4%         | 60.1%-60.2%         |
| H3K27me1                    | 61% - 61.1%                     | 70.4%-70.5%         | 51.3%-51.4%         |
| H3K9me1                     | 58.5% - 58.7%                   | 65.7%-65.8%         | 51.4%-51.5%         |
| H2BK5me1                    | 58.4% - 58.6%                   | 59.4%-59.5%         | 57.2%-57.3%         |
| H4K20me1                    | 58.2% - 58.4%                   | 64.6%-64.7%         | 52%-52.1%           |
| H3K4me1                     | 58.1% - 58.3%                   | 51.7%-51.8%         | 64.3%-64.4%         |
| H3R2me1                     | 57.6% - 57.8%                   | 58.8%-58.9%         | 56.4%-56.5%         |
| H4K16ac                     | 57.5% - 57.7%                   | 61%-61.1%           | 54.1%-54.2%         |
| H3K4me3                     | 57.5% - 57.7%                   | 56.3%-56.4%         | 58.7%-58.8%         |
| H3K79me1                    | 57% - 57.1%                     | 76.1%-76.2%         | 37.6%-37.7%         |
| H4K12ac                     | 56.4% - 56.6%                   | 72.7%-72.8%         | 39.9%-40%           |
| H3K36me1                    | 56.3% - 56.5%                   | 52%-52.1%           | 60.7%-60.8%         |
| H4K8ac                      | 56.2% - 56.4%                   | 70.6%-70.7%         | 41.7%-41.8%         |
| H4K91ac                     | 56.1% - 56.3%                   | 37.1%-37.2%         | 75%-75.1%           |
| H3K4me2                     | 55.5% - 55.7%                   | 50.2%-50.3%         | 61.1%-61.2%         |
| H4R3me2                     | 55.3% - 55.5%                   | 52.5%-52.6%         | 58.2%-58.3%         |
| H2BK20ac                    | 55.3% - 55.5%                   | 39.5%-39.6%         | 71%-71.1%           |
| H3K79me3                    | 55.1% - 55.3%                   | 75.2%-75.3%         | 35.1%-35.2%         |
| H3K27me2                    | 55% - 55.2%                     | 48.4%-48.5%         | 61.3%-61.4%         |
| H2AK5ac                     | 54.6% - 54.8%                   | 39%-39.1%           | 70.4%-70.5%         |
| H4K5ac                      | 54.6% - 54.8%                   | 58.7%-58.8%         | 50.4%-50.5%         |
| H3R2me2                     | 54.3% - 54.5%                   | 56.6%-56.7%         | 52%-52.1%           |
| H3K9me2                     | 54.2% - 54.4%                   | 54.7%-54.8%         | 53.5%-53.6%         |
| H3K27me3                    | 54.1% - 54.3%                   | 47.2%-47.3%         | 60.8%-60.9%         |
| H3K18ac                     | 54% - 54.2%                     | 33.8%-33.9%         | 74.2%-74.3%         |
| H3K4ac                      | 53.9% - 54.1%                   | 39.5%-39.6%         | 68.3%-68.4%         |
| H3K79me2                    | 53.7% - 53.8%                   | 79.4%-79.5%         | 28%-28.1%           |
| H2BK12ac                    | 53.6% - 53.8%                   | 64.3%-64.4%         | 42.8%-42.9%         |
| H3K36ac                     | 53.6% - 53.8%                   | 59.7%-59.8%         | 47.4%-47.5%         |
| H2BK120ac                   | 53.5% - 53.7%                   | 32.2%-32.3%         | 74.7%-74.8%         |
| H2BK5ac                     | 53.4% - 53.6%                   | 55%-55.1%           | 51.7%-51.8%         |
| H3K27ac                     | 53.4% - 53.6%                   | 60.6%-60.7%         | 46.2%-46.3%         |
| H3K9me3                     | 53.3% - 53.5%                   | 65.3%-65.4%         | 41.2%-41.3%         |
| H3K9ac                      | 53.2% - 53.4%                   | 44.6%-44.7%         | 61.8%-61.9%         |
| H3K14ac                     | 52.7% - 52.9%                   | 67.8%-67.9 %        | 37.5%-37.6%         |
| H2AZ                        | 52.5% - 52.7%                   | 28.7%-28.8%         | 76.2%-76.3%         |
| H3K23ac                     | 52.4% - 52.6%                   | 67.6%-67.7%         | 37.2%-37.3%         |
| H2AK9ac                     | 51.8% - 52%                     | 37.3%-37.4%         | 66.2%-66.3%         |

\* 95% confidence interval



**Supplementary Table 3. Support Vector Machine Based Classification of the High Usage and Low Usage Poly(A) Sites (obtained by CD4+ T cell RNA-seq data as well as cDNA/EST Based Approach) using Post-translational Histone Modification Data**

| <b>Histone Modification</b> | <b>Classification Accuracy*</b> | <b>Sensitivity*</b> | <b>Specificity*</b> |
|-----------------------------|---------------------------------|---------------------|---------------------|
| H3K36me3                    | 68.9%-69.9%                     | 80.3%-80.4%         | 58.3%-58.4%         |
| H3K27me1                    | 64.9%-65.3%                     | 76.8%-76.9%         | 53.1%-53.2%         |
| H3K9me1                     | 62.1%-62.5%                     | 71.5%-71.6%         | 52.8%-52.9%         |
| H3R2me1                     | 61.4%-61.8%                     | 69.6%-69.7%         | 53.4%-53.5%         |
| H2BK5me1                    | 61.3%-61.7%                     | 68.1%-68.2%         | 54.8%-54.9%         |
| H4K16ac                     | 61.1%-61.5%                     | 68.7%-68.8%         | 53.7%-53.8%         |
| H3K36me1                    | 60.5%-60.9%                     | 64.2%-64.3%         | 57%-57.1%           |
| H4K20me1                    | 60.4%-60.8%                     | 66.2%-66.3%         | 55%-55.1%           |
| H3K4me1                     | 60.2%-60.6%                     | 60.1%-60.2%         | 60.4%-60.5%         |
| H3K4me3                     | 60.2%-60.6%                     | 66.3%-66.4%         | 54.2%-54.3%         |
| H4K12ac                     | 59%-59.4%                       | 75%-75.1%           | 43.2%-43.3%         |
| H4K8ac                      | 58.7%-59.1%                     | 70.2%-70.3%         | 47.4%-47.5%         |
| H4R3me2                     | 58.5%-58.9%                     | 60.1%-60.2%         | 57%-57.1%           |
| H3K79me1                    | 58.3%-58.7%                     | 61.3%-61.4%         | 55.4%-55.5%         |
| H3K4me2                     | 58.3%-58.6%                     | 57.8%-57.9%         | 59%-59.1%           |
| H4K91ac                     | 57.9%-58.3%                     | 45.8%-45.9%         | 70.2%-70.3%         |
| H3R2me2                     | 57.2%-57.6%                     | 60.6%-60.7%         | 54%-54.1%           |
| H4K5ac                      | 57.1%-57.5%                     | 57%-57.1%           | 57.6%-57.7%         |
| H2BK20ac                    | 56.6%-56.9%                     | 49.1%-49.2%         | 64.3%-64.4%         |
| H3K27me2                    | 56.6%-56.9%                     | 56.5%-56.6%         | 56.8%-56.9%         |
| H2AK5ac                     | 56.2%-56.6%                     | 47.7%-47.8%         | 64.8%-64.9%         |
| H3K9me2                     | 56.2%-56.6%                     | 68.1%-68.2%         | 44.5%-44.6%         |
| H3K79me3                    | 56%-56.4%                       | 50.2%-50.3%         | 62%-62.1%           |
| H3K27me3                    | 56%-56.4%                       | 62.1%-62.2%         | 50%-50.1%           |
| H3K27ac                     | 55.3%-55.7%                     | 54%-54.1%           | 56.8%-56.9%         |
| H3K36ac                     | 55.6%-55.9%                     | 61.1%-61.2%         | 50.2%-50.3%         |
| H3K18ac                     | 55.1%-55.5%                     | 40.1%-40.2%         | 70.4%-70.5%         |
| H3K4ac                      | 55.1%-55.5%                     | 48.3%-48.4%         | 62.2%-62.3%         |
| H2BK120ac                   | 55.1%-55.4%                     | 38.2%-38.3%         | 72.2%-72.3%         |
| H2BK12ac                    | 55%-55.4%                       | 65%-65.1%           | 45.2%-45.3%         |
| H2BK5ac                     | 54.6%-54.9%                     | 47.3%-47.4%         | 62.1%-62.2%         |
| H3K9ac                      | 54%-54.4%                       | 61.2%-61.3%         | 47%-47.1%           |
| H3K79me2                    | 53.8%-54.2%                     | 52.7%-52.8%         | 55.1%-55.2%         |
| H3K9me3                     | 53.6%-54%                       | 68.4%-68.5%         | 39%-39.1%           |
| H3K14ac                     | 53.5%-53.9%                     | 65%-65.1%           | 42.1%-42.2%         |
| H3K23ac                     | 53.4%-53.8%                     | 65.8%-65.9%         | 41.2%-41.3%         |
| H2AZ                        | 52.9%-53.3%                     | 40%-40.1%           | 66%-66.1%           |
| H2AK9ac                     | 52.9%-53.3%                     | 54%-54.1%           | 52%-52.1%           |

\* 95% confidence interval
